# Supplementary material for: A Feasibility Study on the Efficacy of Functional Near-Infrared Spectrometry (fNIRS) to Measure Prefrontal Activation in Paediatric HIV
Source: Hindawi journal article supplement (doi:10.1155/2024/4970794), 2024-02-24
Supplement: f1 [file 4970794.f1.pdf]

Supplementary File 1

Stroop Colour Word Test (SCTW)

| Control   | Congruent | Incongruent |
|-----------|-----------|-------------|
| Dog       | Red       | red         |
| Chair     | yellow    | yellow      |
| Window    | green     | green       |
| Boat      | blue      | blue        |
| Fence     | red       | red         |
| Bottle    | blue      | blue        |
| Cup       | yellow    | yellow      |
| Book      | green     | green       |
| Table     | blue      | blue        |
| Tissue    | red       | red         |
| Desk      | blue      | blue        |
| Computer  | yellow    | yellow      |
| School    | green     | green       |
| Library   | blue      | blue        |
| Donkey    | red       | red         |
| Dog       | blue      | blue        |
| Taxi      | yellow    | yellow      |
| Car       | green     | green       |
| Mall      | blue      | blue        |
| Drink     | red       | red         |
| School    | blue      | blue        |
| Water     | yellow    | yellow      |
| President | green     | green       |
| Boy       | blue      | blue        |

Figure 1: For practice purposes, all children completed a paper version of the Stroop Colour Word Test (SCWT)

fOLD

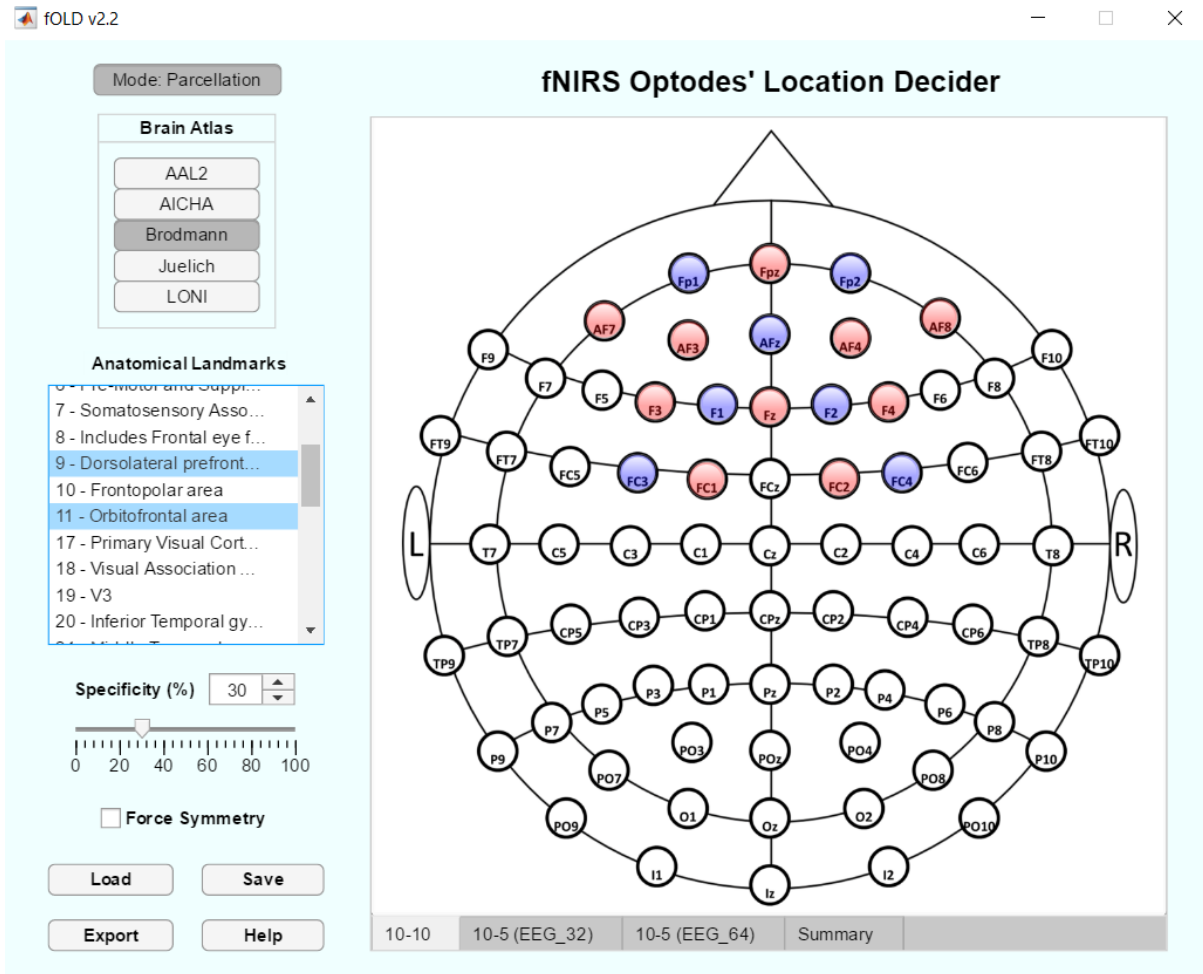

Figure 2: We used the fOLD Software to help identify cortical regions for our study, namely the dorsolateral prefrontal cortex, and the orbitofrontal area.

**Guidelines for experimental presentation for neuroimaging research** (Poldrack et al., 2008)

| <b>Suggested Guidelines</b>                                                                                                                                   | <b>Y/N</b> | <b>Page No</b> |
|---------------------------------------------------------------------------------------------------------------------------------------------------------------|------------|----------------|
| <b><i>Experimental design</i></b>                                                                                                                             |            |                |
| <b>Design specification</b>                                                                                                                                   |            |                |
| Number of blocks, trials or experimental units per session and/or subject                                                                                     | Y          | 7              |
| Length of each trial and interval between trials                                                                                                              | Y          | 8              |
| Blocked designs/Event Related design                                                                                                                          | Y          | 8              |
| Was the design optimized for efficiency, and if so, how?                                                                                                      | Y          | 8              |
| <b>Task specification</b>                                                                                                                                     |            |                |
| Instructions                                                                                                                                                  | Y          | 8              |
| What were subjects asked to do?                                                                                                                               | Y          | 8              |
| Stimuli                                                                                                                                                       | Y          | 7,8            |
| What were the stimuli and how many were there?                                                                                                                | Y          | 8              |
| <b>Human subjects</b>                                                                                                                                         |            |                |
| Number of subjects                                                                                                                                            | Y          | 6              |
| Age (mean and range)                                                                                                                                          | Y          | 6              |
| Handedness                                                                                                                                                    | Y          | 6              |
| Number of males/females                                                                                                                                       | Y          | 14             |
| Additional inclusion/exclusion criteria, if any (including specific sampling strategies that limit inclusion to a specific group, such as laboratory members) | Y          | 6              |
| <b>Details on subject sample</b>                                                                                                                              |            |                |
| If any subjects were scanned but then rejected from analysis after data collection, state how many and reasons for rejection                                  | N/A        | N/A            |
| For group comparisons, what variables (if any) were equated across groups?                                                                                    | Y          | 19             |
| <b>Ethics approval</b>                                                                                                                                        |            |                |
| State which IRB approved the protocol                                                                                                                         | Y          | 7              |
| <b>Behavioural performance</b>                                                                                                                                |            |                |
| How was behavioural performance measured (e.g., response time, accuracy)?                                                                                     | Y          | 8, 21          |
| <b>Data acquisition</b>                                                                                                                                       |            |                |
| Manufacturer, and model name                                                                                                                                  | Y          | 9, 12          |
| Number of experimental sessions and volumes acquired per session                                                                                              | Y          | 7              |
| Whole brain? if not, state area of acquisition (preferably with a figure)                                                                                     | Y          | 10             |
| <b>Data pre-processing (general)</b>                                                                                                                          |            |                |
| Specify order of pre-processing operations                                                                                                                    | Y          | 12             |
| Motion correction                                                                                                                                             | Y          | 12             |
| <b>Statistical modelling</b>                                                                                                                                  |            |                |

|                                                                       |   |               |
|-----------------------------------------------------------------------|---|---------------|
| Block/epoch-based or event-related model                              | Y | 9             |
| ROI analysis                                                          | Y | 10            |
| Figures and tables                                                    | Y | 10, 12, 14-20 |
| What statistical map is the figure/table based upon (e.g., Z, t, p)?  | Y | 19-21         |
| Source of anatomical labels (e.g., atlas, automated labelling method) | Y | 18            |

Adapted from Guidelines for Reporting fMRI study (Poldrack et al., 2008).

Poldrack, R. A., Fletcher, P. C., Henson, R. N., Worsley, K. J., Brett, M., & Nichols, T. E. (2008). Guidelines for reporting an fMRI study. *NeuroImage*, *40*(2), 409–414. <https://doi.org/10.1016/j.neuroimage.2007.11.048>
